# Supplementary material for: Cryo-EM of dynein microtubule-binding domains shows how an axonemal dynein distorts the microtubule
Source: eLife. 2019 Jul 2;8:e47145. doi: 10.7554/eLife.47145 (PMC6629372; doi:10.7554/eLife.47145)
Supplement: Table 1—source data 1. [file elife-47145-table1-data1.xlsx]

## Sheet: Sheet1
	SRS-DYNC1H13260-3427	DYNC1H11230-4646	SRS+-DNAH72758-2896
Microscope	Krios	Polar	Krios
Detector	Falcon III (Linear)	Falcon III (Linear)	Falcon III (Linear)
Voltage (kV)	300	300	300
Exposure time (s)	1.5	1.5	1.5
Total dose (e-/Å2)	60	67.5	55.5
Pixel Size (Å2)	1.04	1.34	1.085
Defocus range (μm)	-1.5 to -4.5	-1.5 to -4.5	-1.5 to -4.5
Sessions	1	1	1
Micrographs	1995	2455	5527
Symmetry	13*	13*	13*
Final particles	59100	38142	41984
Resolution (Å)	4.1	5.5	4.5
