# Supplementary material for: Cryo-EM of dynein microtubule-binding domains shows how an axonemal dynein distorts the microtubule
Source: eLife. 2019 Jul 2;8:e47145. doi: 10.7554/eLife.47145 (PMC6629372; doi:10.7554/eLife.47145)
Supplement: Table 2—source data 1. [file elife-47145-table2-data1.xlsx]

## Sheet: Sheet1
	SRS-DYNC1H13260-3427	SRS+-DNAH72758-2896
Map
Map resolution (Å)	5	5.4
Map sharpening B factor (Å2)	-150	-200
Map CC	0.87	0.84
Map:Model FSC0.5 (Å)	5.06	5.48
Model Composition
Non-hydrogen atoms	8001	14908
Protein residues	1001	1867
Ligands (GTP/GDP)	1/1	2/2
R.m.s deviations
Bond lengths	0.009	0.01
Bond angles	1.91	1.91
Validation
MolProbity score	2.35	2.49
Clashscore	9.05	9.43
Rotamer Outliers (%)	5.37	6.9
Ramachandran plot
Favored (%)	95.5	94.9
Outliers (%)	0.3	0.65
CB Outliers (%)	0.53	0.98
